# Supplementary material for: Trans-synaptic and retrograde axonal spread of Lewy pathology following pre-formed fibril injection in an in vivo A53T alpha-synuclein mouse model of synucleinopathy
Source: PubMed Central journal article supplement (PMC7456087; doi:10.1186/s40478-020-01026-0), 2020-08-28

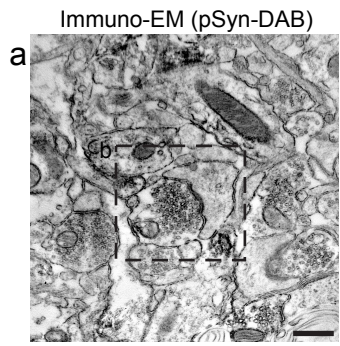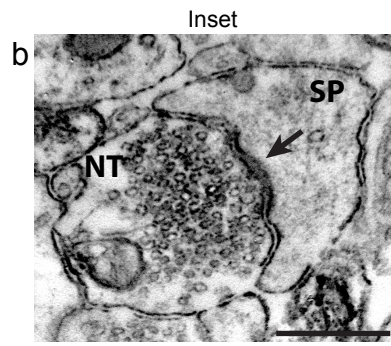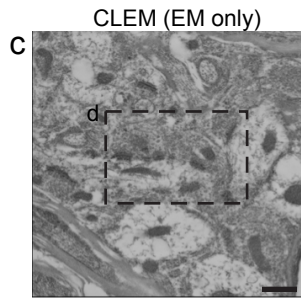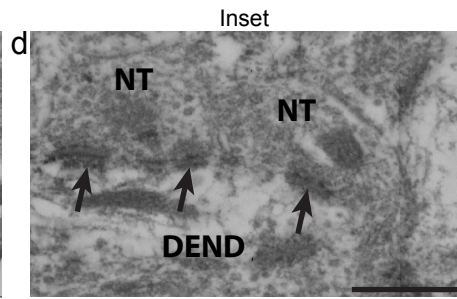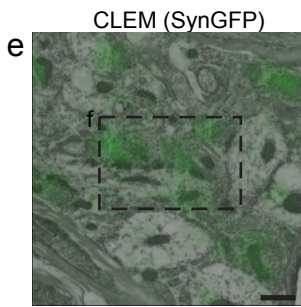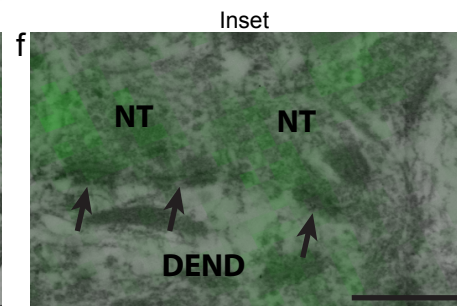

Supplement: 40478_2020_1026_MOESM4_ESM.pdf [file 40478_2020_1026_MOESM4_ESM.pdf]
